# Supplementary material for: Association between Thyroid-Stimulating Hormone Level after Total Thyroidectomy and Hypercholesterolemia in Female Patients with Differentiated Thyroid Cancer: A Retrospective Study
Source: PubMed Central journal article supplement (PMC6723726; doi:10.3390/jcm8081106), 2019-07-25
Supplement: jcm-08-01106-s001.pdf [file jcm-08-01106-s001.pdf]

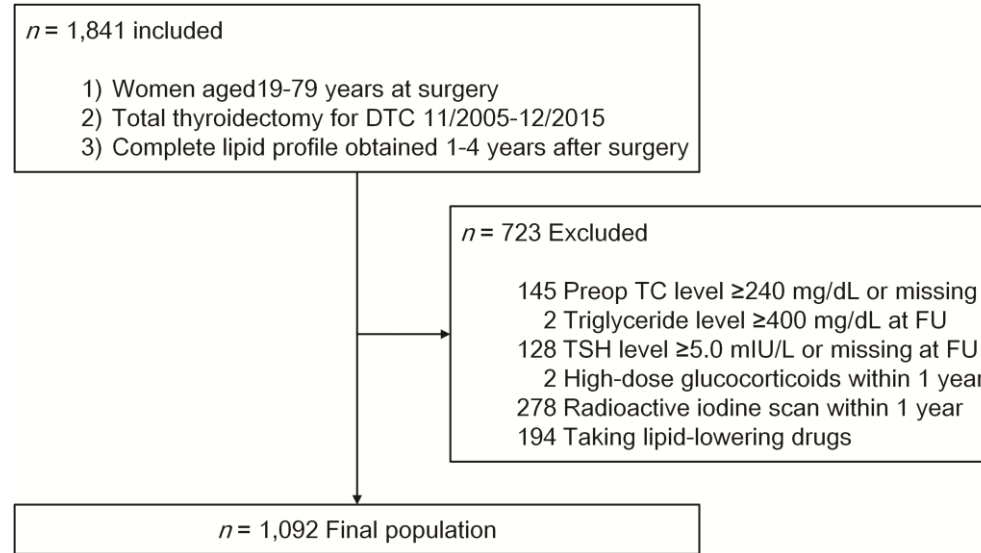

**Figure S1.** Flowchart of the study population. DTC, differentiated thyroid carcinoma; TC, total cholesterol; TSH, thyroid-stimulating hormone; FU, follow-up.

**Table S1.** Association between follow-up TSH level and hypercholesterolemia examined using conventional binary logistic regression.

| Model   | TSH, mIU/L | n   | Total cholesterol level $\geq 200$ mg/dL |                  |         |             | Total cholesterol level $\geq 240$ mg/dL |                   |         |             |
|---------|------------|-----|------------------------------------------|------------------|---------|-------------|------------------------------------------|-------------------|---------|-------------|
|         |            |     | Events                                   | OR (95% CI)      | p value | p for trend | Events                                   | OR (95% CI)       | p value | p for trend |
| Model 1 | <0.03      | 473 | 128                                      | 0.8 (0.6–1.07)   | 0.133   |             | 15                                       | 1.04 (0.48–2.25)  | 0.916   |             |
|         | 0.03–0.3   | 394 | 125                                      | 1 (reference)    |         |             | 12                                       | 1 (reference)     |         |             |
|         | 0.3–2      | 164 | 66                                       | 1.45 (0.99–2.11) | 0.054   |             | 13                                       | 2.74 (1.22–6.14)  | 0.014   |             |
|         | 2–5        | 61  | 28                                       | 1.83 (1.06–3.15) | 0.031   | 0.017       | 5                                        | 2.84 (0.96–8.37)  | 0.058   | 0.006       |
| Model 2 | <0.03      | 473 | 128                                      | 0.75 (0.54–1.03) | 0.077   |             | 15                                       | 1.06 (0.48–2.32)  | 0.89    |             |
|         | 0.03–0.3   | 394 | 125                                      | 1 (reference)    |         |             | 12                                       | 1 (reference)     |         |             |
|         | 0.3–2      | 164 | 66                                       | 2.08 (1.35–3.19) | <0.001  |             | 13                                       | 3.67 (1.58–8.49)  | 0.002   |             |
|         | 2–5        | 61  | 28                                       | 2.89 (1.55–5.39) | <0.001  | <0.001      | 5                                        | 3.92 (1.27–12.17) | 0.018   | <0.001      |
| Model 3 | <0.03      | 473 | 128                                      | 0.76 (0.55–1.06) | 0.104   |             | 15                                       | 1.19 (0.53–2.64)  | 0.678   |             |
|         | 0.03–0.3   | 394 | 125                                      | 1 (reference)    |         |             | 12                                       | 1 (reference)     |         |             |
|         | 0.3–2      | 164 | 66                                       | 2.11 (1.36–3.25) | <0.001  |             | 13                                       | 3.78 (1.61–8.86)  | 0.002   |             |
|         | 2–5        | 61  | 28                                       | 3.17 (1.67–6)    | <0.001  | <0.001      | 5                                        | 4.16 (1.31–13.22) | 0.016   | <0.001      |
| Model   | TSH, mIU/L | n   | LDL-cholesterol level $\geq 130$ mg/dL   |                  |         |             | LDL-cholesterol level $\geq 160$ mg/dL   |                   |         |             |
|         |            |     | Events                                   | OR (95% CI)      | p value | p for trend | Events                                   | OR (95% CI)       | p value | p for trend |
| Model 1 | <0.03      | 473 | 97                                       | 0.87 (0.63–1.21) | 0.405   |             | 16                                       | 0.78 (0.39–1.56)  | 0.476   |             |
|         | 0.03–0.3   | 394 | 90                                       | 1 (reference)    |         |             | 17                                       | 1 (reference)     |         |             |
|         | 0.3–2      | 164 | 38                                       | 1.02 (0.66–1.57) | 0.933   |             | 14                                       | 2.07 (1–4.3)      | 0.052   |             |
|         | 2–5        | 61  | 20                                       | 1.65 (0.92–2.95) | 0.094   | 0.298       | 6                                        | 2.42 (0.91–6.4)   | 0.075   | 0.02        |
| Model 2 | <0.03      | 473 | 97                                       | 0.82 (0.58–1.17) | 0.282   |             | 16                                       | 0.76 (0.37–1.56)  | 0.457   |             |
|         | 0.03–0.3   | 394 | 90                                       | 1 (reference)    |         |             | 17                                       | 1 (reference)     |         |             |
|         | 0.3–2      | 164 | 38                                       | 1.28 (0.8–2.06)  | 0.308   |             | 14                                       | 2.66 (1.24–5.7)   | 0.012   |             |
|         | 2–5        | 61  | 20                                       | 2.37 (1.23–4.54) | 0.01    | 0.039       | 6                                        | 3.14 (1.13–8.74)  | 0.028   | 0.004       |
| Model 3 | <0.03      | 473 | 97                                       | 0.84 (0.59–1.19) | 0.326   |             | 16                                       | 0.89 (0.43–1.84)  | 0.756   |             |
|         | 0.03–0.3   | 394 | 90                                       | 1 (reference)    |         |             | 17                                       | 1 (reference)     |         |             |
|         | 0.3–2      | 164 | 38                                       | 1.28 (0.8–2.06)  | 0.305   |             | 14                                       | 2.76 (1.26–6.04)  | 0.011   |             |
|         | 2–5        | 61  | 20                                       | 2.44 (1.26–4.71) | 0.008   | 0.035       | 6                                        | 3.36 (1.17–9.63)  | 0.024   | 0.003       |

Binary multivariable logistic regression model was adjusted for age at follow-up, duration of follow-up, cigarette smoking status, body mass index, systolic blood pressure, fasting glucose level, and preoperative cholesterol level. Abbreviations: CI, confidence interval; OR, odds ratio; LDL, low-density lipoprotein; TSH, thyroid-stimulating hormone.
